# Supplementary material for: A systematic review of interventions to provide genetics education for primary care
Source: PubMed Central journal article supplement (PMC4957387; doi:10.1186/s12875-016-0483-2), 2016-07-22
Supplement: 12875_2016_483_MOESM2_ESM.pdf [file 12875_2016_483_MOESM2_ESM.pdf]

## Additional material 2: Main themes and categories derived from the analysis.

| <b>Themes and categories</b>                                                                                                                                                                                                                                                                                                                                                                                                                                                                                                                                                                                                                                                                |
|---------------------------------------------------------------------------------------------------------------------------------------------------------------------------------------------------------------------------------------------------------------------------------------------------------------------------------------------------------------------------------------------------------------------------------------------------------------------------------------------------------------------------------------------------------------------------------------------------------------------------------------------------------------------------------------------|
| <p><b><i>Prior experience</i></b></p> <ul style="list-style-type: none"><li>• Prior personal experiences of genetic condition</li><li>• Prior experience ordering a genetic test</li><li>• Prior experience caring for patients with genetic condition</li><li>• Prior experience referred patient for genetic counselling</li><li>• Prior knowledge of genetics professionals.</li><li>•</li></ul>                                                                                                                                                                                                                                                                                         |
| <p><b><i>Changes in confidence</i></b></p> <ul style="list-style-type: none"><li>• Changes in confidence about genetic skills pre-education</li><li>• Changes in confidence in management of patients</li><li>• Changes in confidence ordering genetic tests</li><li>• Changes in confidence in providing counselling</li><li>• Changes in confidence to provide screening information</li><li>• Changes in confidence to provide psychosocial support after genetic test result</li><li>• Changes in confidence to be informal resource to other health professionals.</li></ul>                                                                                                           |
| <p><b><i>Changes in knowledge</i></b></p> <ul style="list-style-type: none"><li>• Changes in knowledge of genetics</li><li>• Changes in knowledge of genetic conditions</li><li>• Changes in understanding what happens in genetic services</li><li>• Changes in knowledge of prenatal issues</li><li>• Changes in awareness of need for counselling</li><li>• Changes in knowledge of genetic tests</li><li>• Changes in knowledge of genetic disease.</li></ul>                                                                                                                                                                                                                           |
| <p><b><i>Changes in practice</i></b></p> <ul style="list-style-type: none"><li>• Application of knowledge</li><li>• Overall changes in clinical practice</li><li>• Changes in referral behaviour</li><li>• Changes in genetic risk assessment</li><li>• Changes in completeness of family history information</li><li>• Changes in contact with genetic services</li><li>• Changes in risk assessment of patients with cancer family history</li><li>• Changes in ability to discuss/refer to genetic services</li><li>• Increased awareness of genetics when seeing patients</li><li>• Changes in importance given to family history</li><li>• Changes in use of family history.</li></ul> |

***Satisfaction and feedback***

- Satisfaction with course
- Views on web-based course delivery.

***Other***

- Use of software for family history cancer assessment
- Changes in patient knowledge
- Changes in patient risk perception
- Changes in attitude to genetic testing.
